# Supplementary material for: Cold tolerance ofDrosophilaspecies is tightly linked to epithelial K+ transport capacity of the Malpighian tubules and rectal pads
Source: Oxford University Press journal article supplement (doi:10.1242/jeb.168518), 2017-01-01
Supplement: jeb168518supp.pdf [file jeb168518supp.pdf]

SUPPLEMENTARY MATERIAL

The supplementary material contains morphological measurements of the ionoregulatory organs, namely the Malpighian tubules and the rectum.

Figure S1

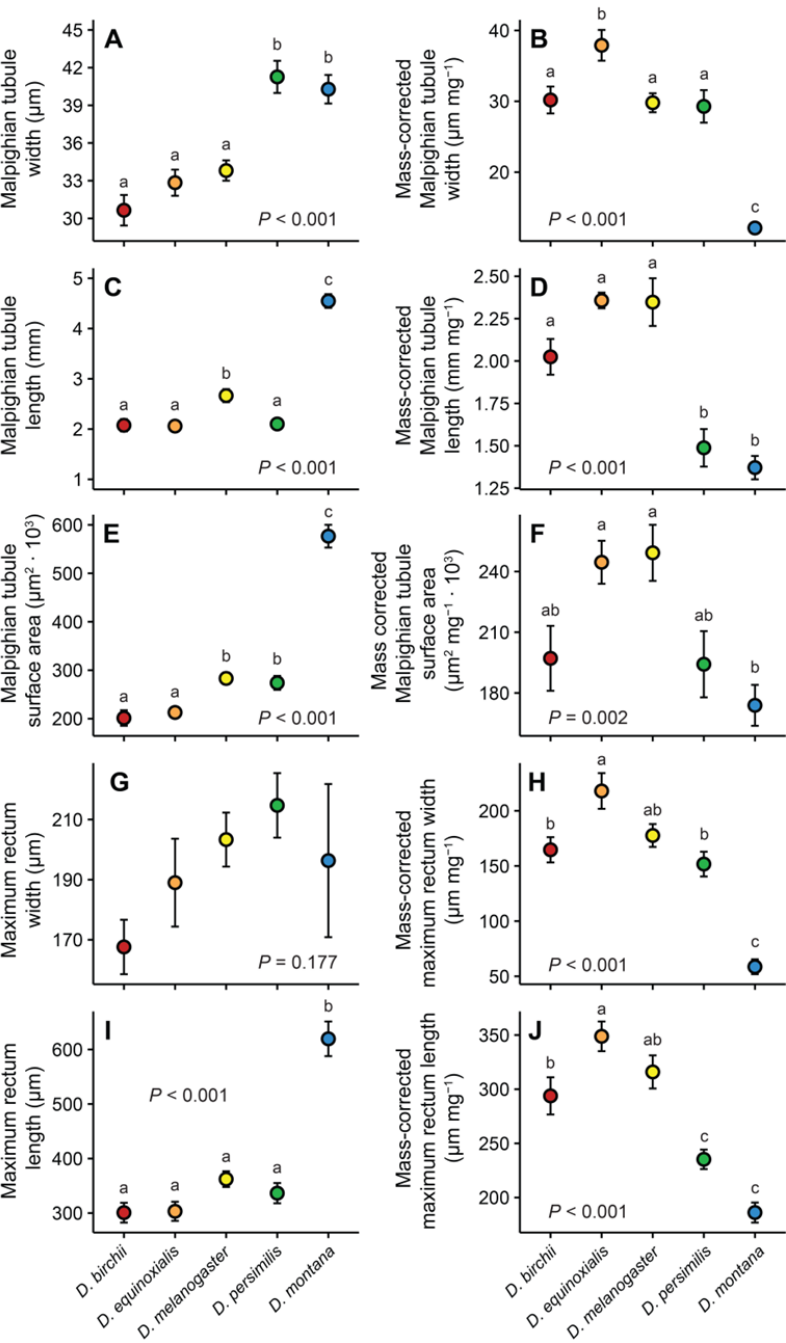

**Figure S1 – Morphological measurements of the ionoregulatory organs in five species of *Drosophila*.** To investigate if differences in ionoregulatory capacity related to differences in organ size, we measured (A) width and (C) length of the Malpighian tubules to calculate (E) surface area and (Fig. 3B) volume, along with the (G) width and (I) length of the rectum. Additionally, these measurements were corrected for body mass (right column; values for mass found in Fig. 3A). Data points sharing a letter are not statistically different (Tukey's Honest Significant Differences *post hoc* test) and error bars not visible are occluded by the symbols. N = 5-7 per species.
